# Supplementary material
Source: PubMed Central journal article supplement (PMC6871078)
Supplement: 41431_2019_431_MOESM1_ESM.pdf [file 41431_2019_431_MOESM1_ESM.pdf]

**Supplementary Figures** Histopathological images of the heart.

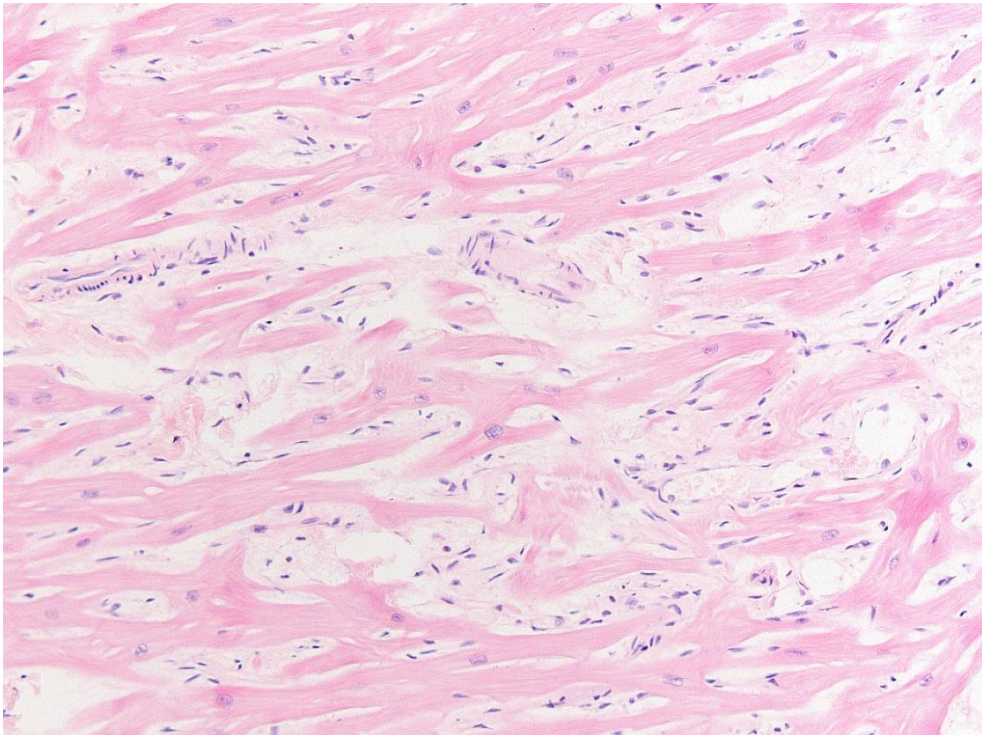

**Supplementary Figure 1** The cardiomyocytes show a disorganised pattern (myofibre disarray) around foci of interstitial collagen (interstitial fibrosis) and some blood vessels. Some nuclei are swollen (karyomegaly). H&E, original magnification x200.

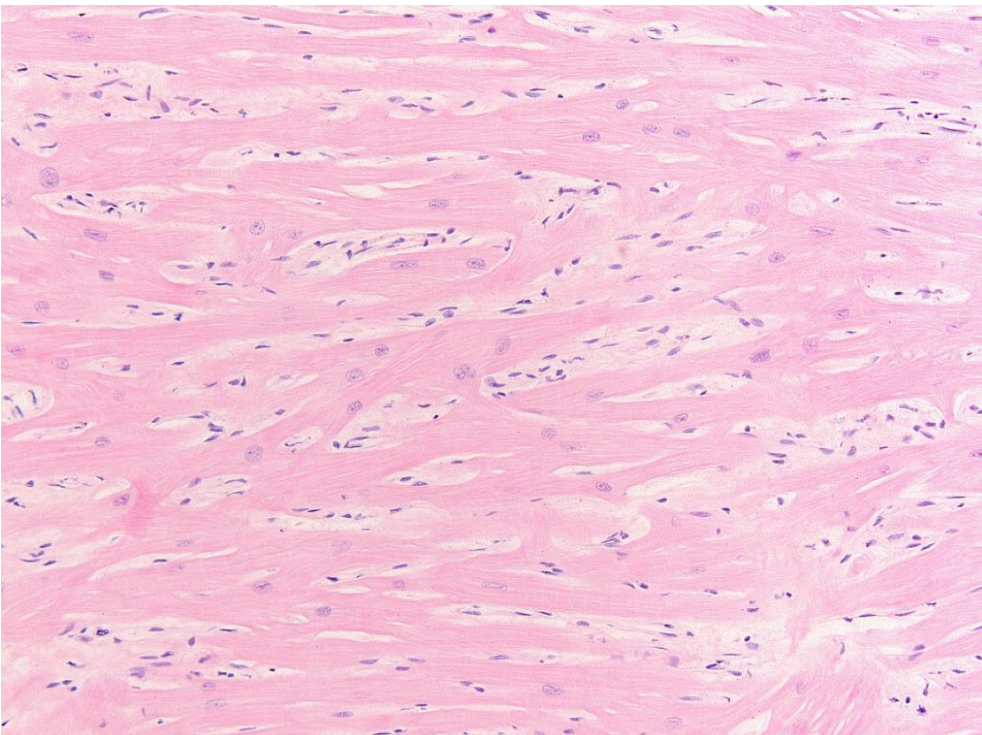

**Supplementary Figure 2** Branching and myofibre disarray admixed with interstitial fibrosis and hypertrophic cardiomyocytes with karyomegaly. H&E, original magnification x200.

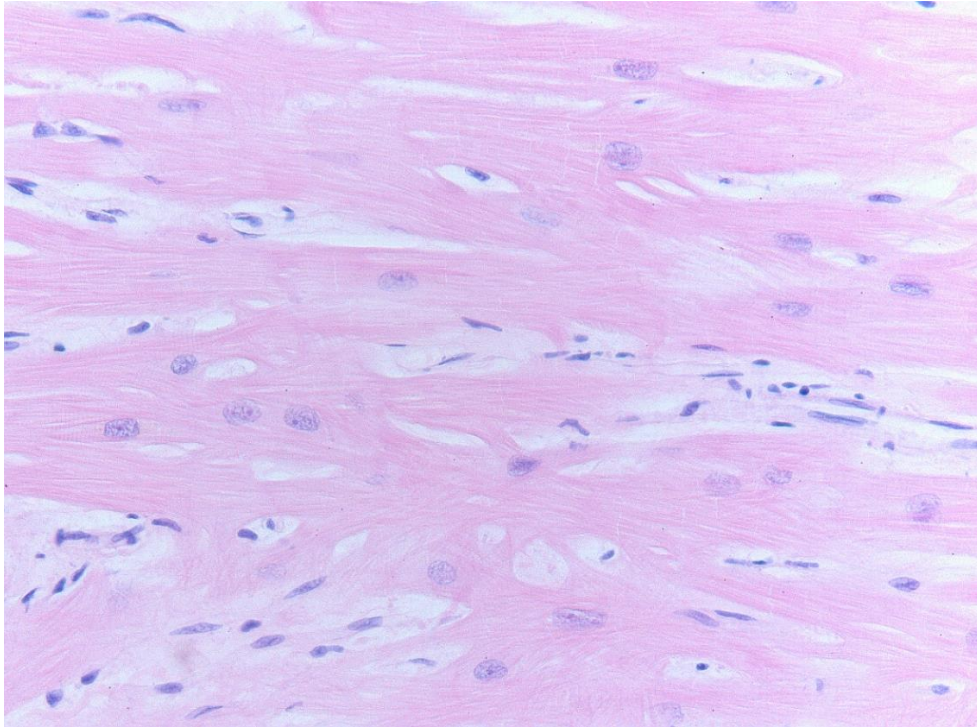

**Supplementary Figure 3** The cardiomyocytes display branching, karyomegaly and a disorganised pattern. H&E, original magnification x400.

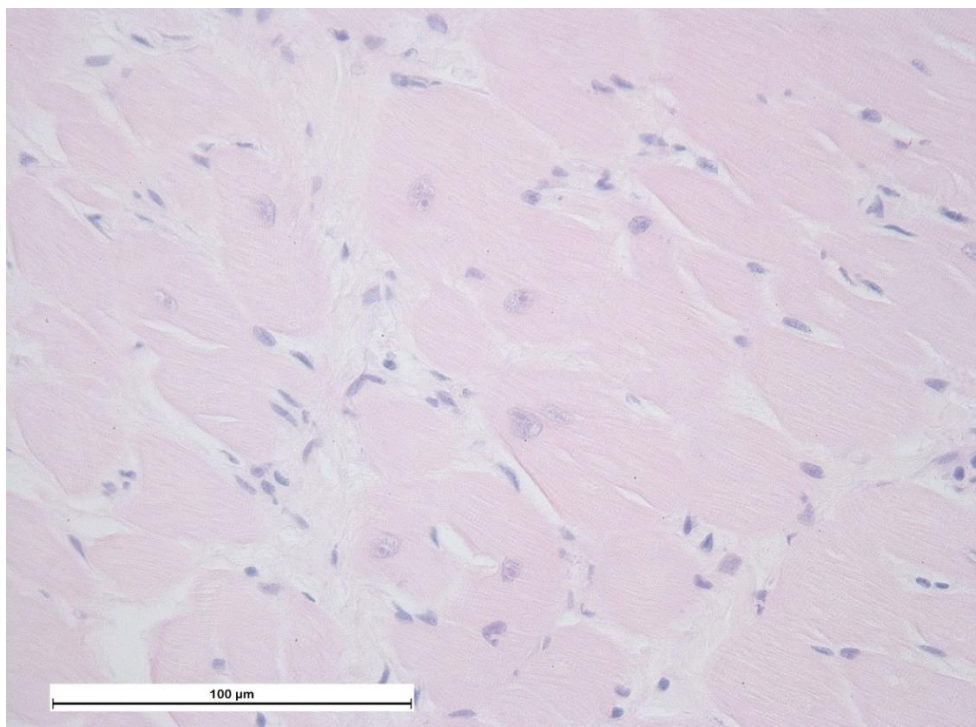

**Supplementary Figure 4** Hypertrophic cardiomyocytes have diameters up to 67 µm (measured at the level of the nucleus). H&E, original magnification x400.



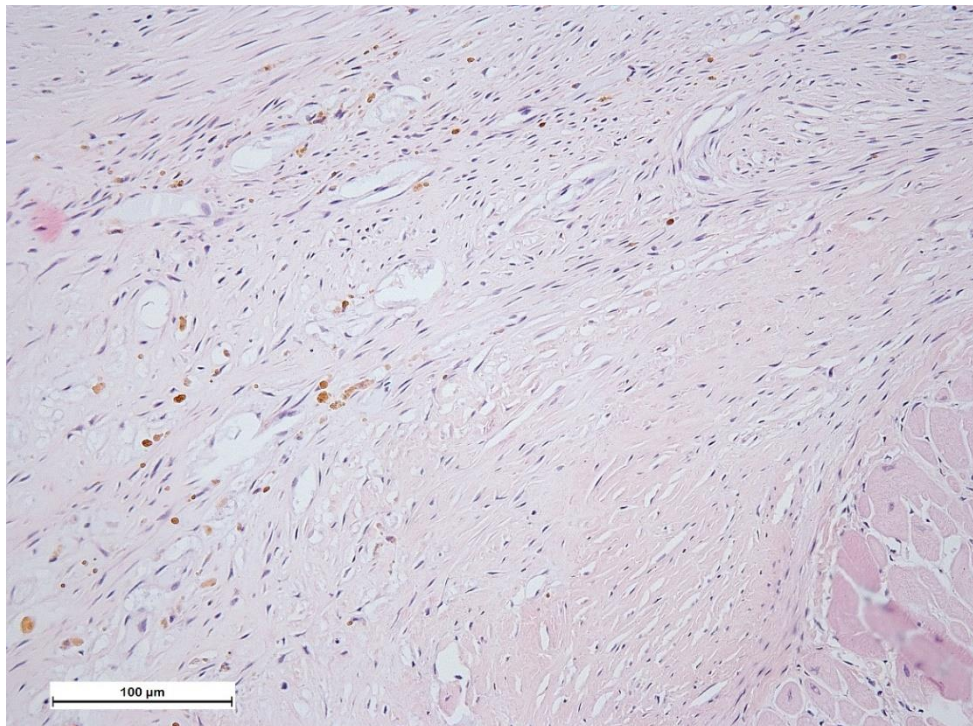

**Supplementary Figure 5** The subendocardial region shows deposition of extracellular matrix (mainly collagen) admixed with neovascularisation, fibroblasts and large aggregates of hemosiderin-laden macrophages. There is a maturation to dense collagenous connective tissue in the proximity of the myocard. H&E, original magnification x200.
