# Supplementary material
Source: PubMed Central journal article supplement (PMC6871078)
Supplement: 41431_2019_431_MOESM2_ESM.pdf [file 41431_2019_431_MOESM2_ESM.pdf]

**Supplementary Tables** Details on the qPCR assay and PCR, sequencing and RFLP reactions and the variants found in this study.

**Supplementary Table 1** Primers, probes, program and mixes of the qPCR assay.

| Primers   probes | <i>MYBPC3</i> c.91G>C                        | <i>MYBPC3</i> c.2455C>T                    |
|------------------|----------------------------------------------|--------------------------------------------|
| Forward primer   | 5'-GAAGCCAAGGTCAGTG-3'                       | 5'-GACCAGAGCTCCTGTC-3'                     |
| Reverse primer   | 5'-CTAGGCCATACTTGTCCAC-3'                    | 5'-CGTAGACTCGCATCTCA-3'                    |
| Wild-type probe  | 5'-FAM-TGTCTCGG <u>C</u> CTCGAA-BHQ1-3'      | 5'-FAM-TTCAGCC <u>G</u> CATCCACC-BHQ1-3'   |
| Variant probe    | 5'-TEXASRED-TGTCTCGG <u>G</u> CTCGAA-BHQ2-3' | 5'-HEX-AGTTCAGCC <u>A</u> CATCCACC-BHQ1-3' |
| qPCR program     | c.91G>C qPCR mix                             | c.2455C>T qPCR mix                         |
| 14'40" - 95 °C   | 4.9 µl H <sub>2</sub> O                      | 4.9 µl H <sub>2</sub> O                    |
| 00'20" - 95 °C   | 1.0 µl 10x Key Buffer                        | 1.0 µl 10x Key Buffer                      |
| 00'40" - 59 °C   | 1.0 µl Primers (5 µM each)                   | 1.0 µl Primers (5 µM each)                 |
| Signal detection | 0.4 µl Wild-type probe (10 µM)               | 0.5 µl Wild-type probe (5 µM)              |
|                  | 0.4 µl Variant probe (10 µM)                 | 0.3 µl Variant probe (5 µM)                |
|                  | 0.2 µl dNTPs (10 mM each)                    | 0.2 µl dNTPs (10 mM each)                  |
|                  | 0.1 µl Polymerase (5 U/µl)                   | 0.1 µl Polymerase (5 U/µl)                 |
|                  | <u>2.0 µl Template</u>                       | <u>2.0 µl Template</u>                     |
|                  | 10.0 µl Total volume                         | 10.0 µl Total volume                       |

**Supplementary Table 2** PCR primer pairs with the location where each primer binds, the lengths of the amplicons and the respective PCR mixes and programs, as depicted in Supplementary Table 3. Locations are identified like in ENSFCAT00000002530.5 for *MYBPC3* and ENSFCAT00000009094.5 for *MYH7*.

| <i>MYBPC3</i> cDNA primer pairs      | Location | Amplicon length | PCR mix | PCR program |
|--------------------------------------|----------|-----------------|---------|-------------|
| 1f: 5'-TCCTTGGGTGGCCTGTGACT-3'       | 5' UTR   | 745             | 1       | 1           |
| 1r: 5'-TGCGAAAGTAGTCTGGGCATCTGT-3'*  | Exon 6   |                 |         |             |
| 2f: 5'-TGACCCCATCGGCCTCTTTGTG-3'*    | Exon 4   | 810             | 1       | 1           |
| 2r: 5'-GCACCCACGGACTCGAAGATGT-3'*    | Exon 14  |                 |         |             |
| 3f: 5'-GGGCATGAAGCGAGACGAGAAGA-3'*   | Exon 11  | 638             | 1       | 1           |
| 3r: 5'-ACTTGAACCCGCTGGTCCCTT-3'*     | Exon 17  |                 |         |             |
| 4f: 5'-ACGGGCAGAGACACCACCTCAT-3'*    | Exon 16  | 697             | 1       | 1           |
| 4r: 5'-GTGAAGATGCTGCGGTCCTTGGT-3'*   | Exon 22  |                 |         |             |
| 5f: 5'-AGCTACGCCTGGATGTCCCTATCT-3'*  | Exon 20  | 729             | 1       | 1           |
| 5r: 5'-ACTCCACGCTGTAGCCATCAA-3'*     | Exon 25  |                 |         |             |
| 6f: 5'-TGATTGAGGGCGTGGTGTATGAGA-3'   | Exon 24  | 860             | 2       | 1           |
| 6r: 5'-AGTGGCAGCGTAATGTTCCAAGACA-3'* | Exon 30  |                 |         |             |
| 7f: 5'-TGCTGCGGATCGAGAACATGGA-3'*    | Exon 28  | 865             | 1       | 1           |
| 7r: 5'-AGGCCCGCTCACCTTAATTGC-3'      | 3' UTR   |                 |         |             |
| <i>MYH7</i> cDNA primer pairs        | Location | Amplicon length | PCR mix | PCR program |
| 8f: 5'-TGCTCTGTCTTTCCTTGCTGCTCT-3'*  | Exon 1   | 858             | 1       | 2           |
| 8r: 5'-TTCCGGTCGCCCCAAAATGGA-3'      | Exon 9   |                 |         |             |
| 9f: 5'-GGGATCGCAGCAAGAAGGAGCA-3'*    | Exon 7   | 747             | 1       | 2           |
| 9r: 5'-GCTTGGTCTCCAGGGTGGCATT-3'     | Exon 14  |                 |         |             |
| 10f: 5'-CATGTACAAGCTGACGGGTGCCAT-3'* | Exon 12  | 958             | 1       | 2           |
| 10r: 5'-GGGATGTGTAGAGCGCAAGTTGGT-3'* | Exon 18  |                 |         |             |

**Supplementary Table 2** (continued)

| <b>MYH7 cDNA primer pairs</b>             | Location      | Amplicon length | PCR mix | PCR program |
|-------------------------------------------|---------------|-----------------|---------|-------------|
| 11f: 5'-GTCCTCCCTCAAGATGCTCAGTAACC-3'*    | Exon 16       | 859             | 1       | 2           |
| 11r: 5'-GTTGTCTTGTTCGCCTGCACTT-3'         | Exons 22 & 23 |                 |         |             |
| 12f: 5'-GCTGCTGGGCTCCCTAGACATT-3'*        | Exon 20       | 844             | 1       | 2           |
| 12r: 5'-GACTTTGGCCTTGGTCAGGGTGT-3'        | Exon 24       |                 |         |             |
| 13f: 5'-TGGAGAAGGAGAAGCATGCAACAGA-3'*     | Exon 23       | 936             | 2       | 2           |
| 13r: 5'-GGCTGGTGAGGTCGTTGACAGAA-3'        | Exon 28       |                 |         |             |
| 14f: 5'-AACCTGCAGCGTGTGAAGCAGAA-3'*       | Exon 27       | 964             | 1       | 2           |
| 14r: 5'-GGACTTTCTCCAGCTCATGGATGGTT-3'     | Exon 33       |                 |         |             |
| 15f: 5'-CCATCCAGAGGACAGAGGAGCTTGA-3'*     | Exon 30       | 805             | 1       | 2           |
| 15r: 5'-TGGAGACCCTTGACTTGCTTCTGG-3'       | Exon 34       |                 |         |             |
| 16f: 5'-AACCATCCATGAGCTGGAGAAAGTCC-3'*    | Exon 33       | 615             | 1       | 2           |
| 16r: 5'-TGGTTGATGAGGCTGGTGTCTGG-3'        | Exons 35 & 36 |                 |         |             |
| 17f: 5'-CCGTGCCAACGACGACCTGA-3'*          | Exon 35       | 918             | 2       | 2           |
| 17r: 5'-TGCTTCATCAAAGGGGCTGCT-3'*         | Exon 40       |                 |         |             |
| <b>MYH7 gDNA primer pair for PCR-RFLP</b> | Location      | Amplicon length | PCR mix | PCR program |
| 18f: 5'-GGTAACGACCACGGCGGGAGA-3'          | Intron 37-38  | 376             | 1       | 3           |
| 18r: 5'-CGCTCCTGCTCATCCAGCTC-3'           | Exon 39       |                 |         |             |

\*These primers were used as sequencing primers.

**Supplementary Table 3** PCR and sequencing mixes and programs.

| <b>PCR mix 1</b>           | <b>PCR mix 2</b>           | <b>Sequencing mix</b>           |                           |
|----------------------------|----------------------------|---------------------------------|---------------------------|
| 5.7 µl H <sub>2</sub> O    | 4.7 µl H <sub>2</sub> O    | 2.0 µl H <sub>2</sub> O         |                           |
| 1.0 µl 10x Key Buffer      | 1.0 µl 10x Key Buffer      | 2.0 µl 5x Sequencing buffer     |                           |
| 1.0 µl Primers (5 µM each) | 1.0 µl GC-rich             | 2.0 µl GC-rich                  |                           |
| 0.2 µl dNTPs (10 mM each)  | 1.0 µl Primers (5 µM each) | 1.5 µl Sequencing primer (2 µM) |                           |
| 0.1 µl Polymerase (5 U/µl) | 0.2 µl dNTPs (10 mM each)  | 0.5 µl RR-mix                   |                           |
| <u>2.0 µl Template</u>     | 0.1 µl Polymerase (5 U/µl) | <u>2.0 µl Template</u>          |                           |
| 10.0 µl Total volume       | <u>2.0 µl Template</u>     | 10.0 µl Total volume            |                           |
|                            | 10.0 µl Total volume       |                                 |                           |
| <b>PCR program 1</b>       | <b>PCR program 2</b>       | <b>PCR program 3</b>            | <b>Sequencing program</b> |
| 14'00" - 95 °C             | 14'15" - 95 °C             | 14'30" - 95 °C                  | 2'00" - 95 °C             |
| 01'00" - 95 °C             | 00'45" - 95 °C             | 00'30" - 95 °C                  | 0'20" - 95 °C             |
| 01'00" - 65 °C             | 00'45" - 64 °C             | 00'30" - 66 °C                  | 4'00" - 65 °C             |
| 02'00" - 72 °C             | 01'30" - 72 °C             | 01'00" - 72 °C                  | Hold - 4 °C               |
| 05'00" - 72 °C             | 05'00" - 72 °C             | 02'00" - 72 °C                  |                           |
| Hold - 15 °C               | Hold - 15 °C               | Hold - 15 °C                    |                           |

**Supplementary Table 4** Restriction digest mix and reaction conditions.

| <b>Restriction digest mix</b> | <b>Reaction conditions</b> |
|-------------------------------|----------------------------|
| 1.0 µl NEBuffer 4             | Temperature: 37 °C         |
| 2.0 µl <i>Bse</i> RI (5 U/µl) | Duration: > 6 hours        |
| <u>7.0 µl Template</u>        |                            |
| 10.0 µl Total volume          |                            |

**Supplementary Table 5** Variants found in *MYBPC3* and *MYH7* of the described case.

| <b>MYBPC3 variants (XM_019812396.1)</b> |                |              | <b>MYH7 variants (XM_006932746.4)</b> |                |              |
|-----------------------------------------|----------------|--------------|---------------------------------------|----------------|--------------|
| c.220G>A                                | p.(Ala74Thr)   | heterozygote | c.975T>C                              | p.(Asp325=)    | heterozygote |
| c.414T>C                                | p.(Ser138=)    | homozygote   | c.1128C>T                             | p.(Asp376=)    | heterozygote |
| c.772G>A                                | p.(Val258Ile)  | heterozygote | c.1572T>C                             | p.(Ile524=)    | heterozygote |
| c.1032T>C                               | p.(Arg344=)    | heterozygote | c.1719G>A                             | p.(Pro573=)    | heterozygote |
| c.1311C>T                               | p.(Gly437=)    | heterozygote | c.3546G>A                             | p.(Thr1182=)   | homozygote   |
| c.1326C>T                               | p.(Ser442=)    | heterozygote | c.4053A>G                             | p.(Thr1351=)   | heterozygote |
| c.1956C>T                               | p.(Arg652=)    | heterozygote | c.4308T>C                             | p.(Asn1436=)   | heterozygote |
| c.2765C>T                               | p.(Pro922Leu)  | heterozygote | c.4314C>T                             | p.(Ala1438=)   | heterozygote |
| c.2847A>G                               | p.(Ala949=)    | homozygote   | c.4815G>A                             | p.(Thr1605=)   | homozygote   |
| c.3109G>A                               | p.(Ala1037Thr) | heterozygote | c.5647G>A                             | p.(Glu1883Lys) | heterozygote |
| c.3267A>G                               | p.(Gln1089=)   | heterozygote |                                       |                |              |

**Supplementary Table 6** Variants in *MYBPC3* and *MYH7* of the 8 other HCM-affected cats where the coding regions of these genes were sequenced. These cats were 5 Domestic Shorthairs, 2 British Shorthairs and one crossbreed Domestic Shorthair x Persian. The allele frequency in this group of 8 cats is given for each variant. None of these variants was considered to cause HCM. All variants were archived in the EVA database together with the variants in the described case (<https://www.ebi.ac.uk/eva/?Study-Browser&browserType=sgv>; project ID: PRJEB30318; analysis ID: ERZ795310).

| <b>MYBPC3 variants (XM_019812396.1)</b> |                |        | <b>MYH7 variants (XM_006932746.4)</b> |              |        |
|-----------------------------------------|----------------|--------|---------------------------------------|--------------|--------|
| c.175G>A                                | p.(Ala59Thr)   | 0.0625 | c.85C>A                               | p.(Arg29=)   | 0.0625 |
| c.220G>A                                | p.(Ala74Thr)   | 0.125  | c.975T>C                              | p.(Asp325=)  | 0.4375 |
| c.311C>T                                | p.(Pro104Leu)  | 0.0625 | c.1128C>T                             | p.(Asp376=)  | 0.25   |
| c.414T>C                                | p.(Ser138=)    | 1.0    | c.1572T>C                             | p.(Ile524=)  | 0.375  |
| c.772G>A                                | p.(Val258Ile)  | 0.25   | c.1719G>A                             | p.(Pro573=)  | 0.1875 |
| c.1032T>C                               | p.(Arg344=)    | 1.0    | c.1746C>T                             | p.(Tyr582=)  | 0.1875 |
| c.1806C>T                               | p.(Asp602=)    | 0.25   | c.1872T>C                             | p.(Tyr624=)  | 0.0625 |
| c.1956C>T                               | p.(Arg652=)    | 1.0    | c.2289G>A                             | p.(Val763=)  | 0.125  |
| c.2095G>A                               | p.(Ala699Thr)  | 0.0625 | c.2886C>T                             | p.(Ala962=)  | 0.0625 |
| c.2607C>T                               | p.(Pro859=)    | 0.3125 | c.2943A>G                             | p.(Glu981=)  | 0.125  |
| c.2765C>T                               | p.(Pro922Leu)  | 0.9375 | c.3132G>T                             | p.(Val1044=) | 0.0625 |
| c.2847A>G                               | p.(Ala949=)    | 0.875  | c.3171C>T                             | p.(Gly1057=) | 0.0625 |
| c.2976C>A                               | p.(Leu992=)    | 0.0625 | c.3459C>T                             | p.(Ala1153=) | 0.1875 |
| c.3109G>A                               | p.(Ala1037Thr) | 0.9375 | c.3546G>A                             | p.(Thr1182=) | 0.1875 |
| c.3126C>T                               | p.(Tyr1042=)   | 0.125  | c.3813C>T                             | p.(Asn1271=) | 0.125  |
| c.3267A>G                               | p.(Gln1089=)   | 0.0625 | c.4053A>G                             | p.(Thr1351=) | 0.3125 |
| c.3388A>G                               | p.(Ile1130Val) | 0.0625 | c.4200C>G                             | p.(Ala1400=) | 0.125  |
| c.3525C>T                               | p.(Asp1175=)   | 0.1875 | c.4308T>C                             | p.(Asn1436=) | 0.25   |
| c.3799C>T                               | p.(Leu1267=)   | 0.0625 | c.4314C>T                             | p.(Ala1438=) | 0.125  |
|                                         |                |        | c.4509A>G                             | p.(Lys1503=) | 0.8125 |
|                                         |                |        | c.4815G>A                             | p.(Thr1605=) | 0.9375 |
|                                         |                |        | c.4959C>T                             | p.(Thr1653=) | 0.3125 |
|                                         |                |        | c.5106G>A                             | p.(Ala1702=) | 0.1875 |
|                                         |                |        | c.5550C>G                             | p.(Leu1850=) | 0.25   |
